# Supplementary material for: Behavioral, metabolic, and lipidomic characterization of the 5xFADxTg30 mouse model of Alzheimer’s disease
Source: PubMed Central journal article supplement — iScience. 2024 Jan 4;27(2):108800. doi: 10.1016/j.isci.2024.108800 (PMC10826307; doi:10.1016/j.isci.2024.108800), 2024-01-04
Supplement: mmc1.pdf [file mmc1.pdf]

**Supplemental information**

**Behavioral, metabolic, and lipidomic  
characterization of the 5xFADxTg30  
mouse model of Alzheimer's disease**

**J.P.S. Marshall, K. Huynh, G.I. Lancaster, J. Ng, J.M. Collins, G. Pernes, A. Liang, T. Featherby, N.A. Mellet, B.G. Drew, A.C. Calkin, A.E. King, P.J. Meikle, M.A. Febbraio, P.A. Adlard, and D.C. Henstridge**

Figure S1: Animal flow chart of Cohort 1: behavioural cohort related to figure 1 and 2

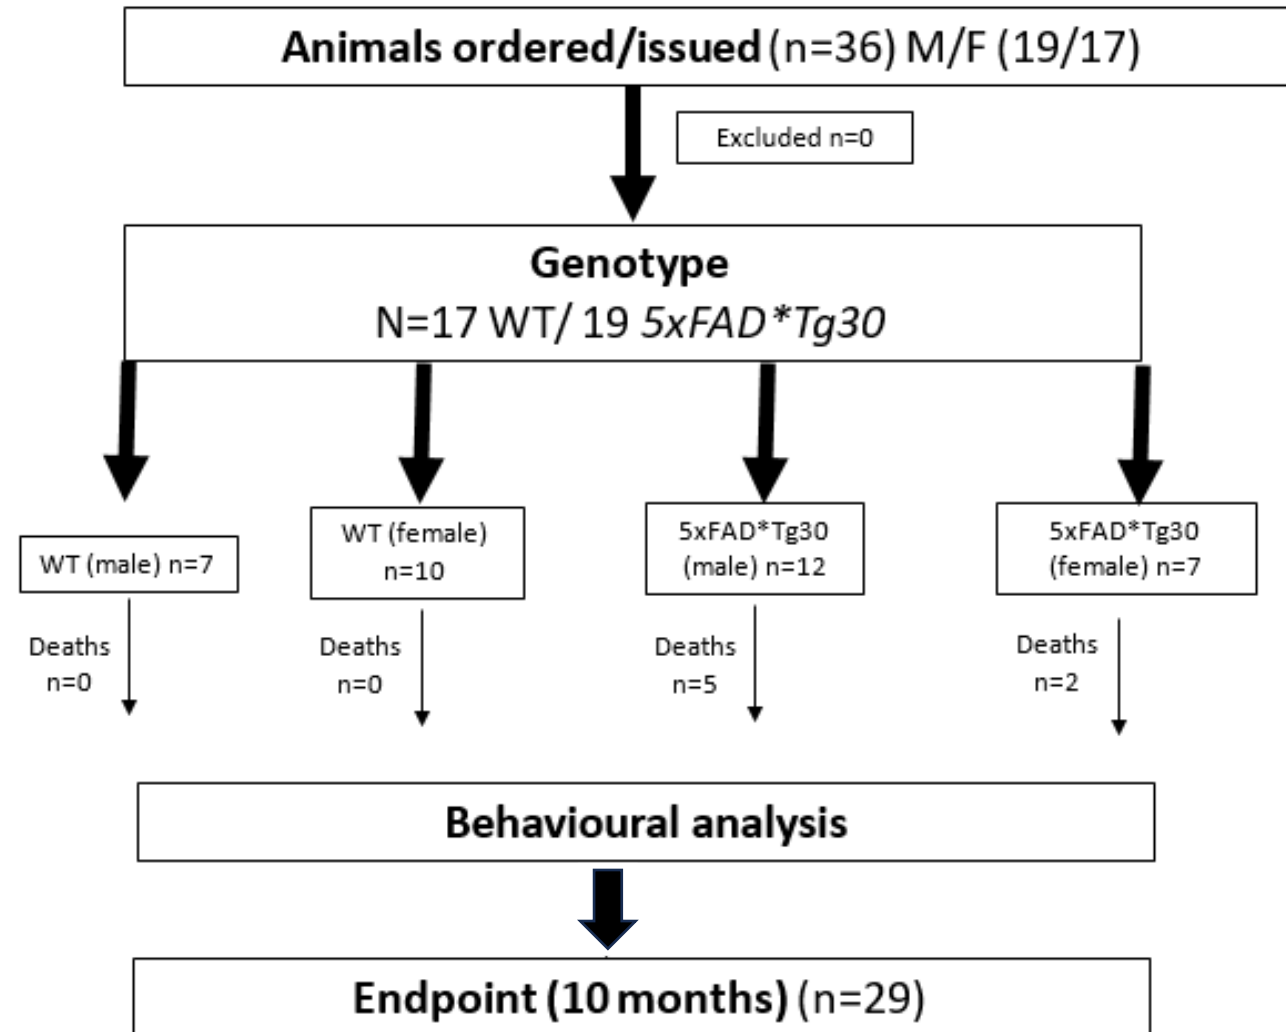

**Figure S2: Animal flow chart of Cohort 2: metabolic cohort related to figure 3, 4 and 5.**

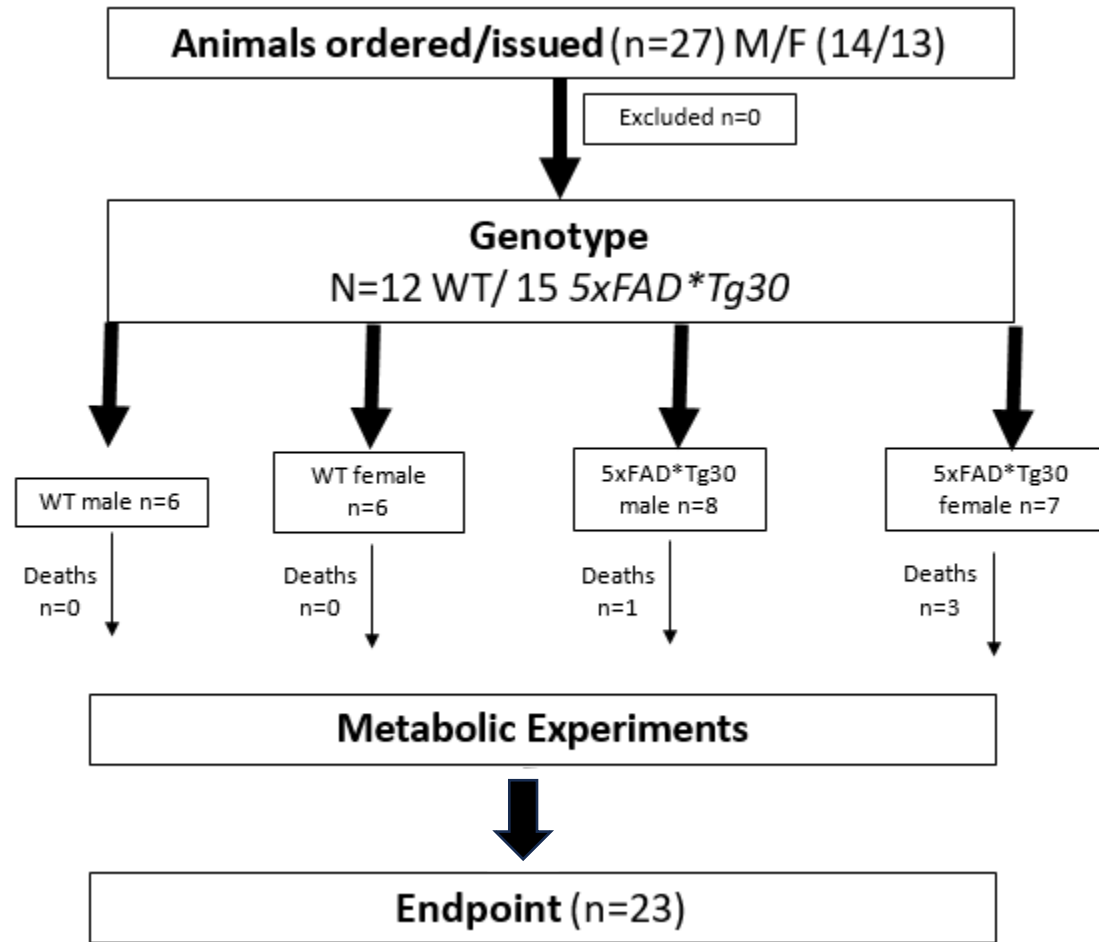

Supplementary Table 1 - Plasma lipid class differences between WT and 5xFAD\*Tg30 mice related to Figure 6.

| Lipid class | Female Mice     |              |               |                 |                  | Male Mice       |              |               |                 |                  |
|-------------|-----------------|--------------|---------------|-----------------|------------------|-----------------|--------------|---------------|-----------------|------------------|
|             | Fold difference | Lower 95% CI | Higher 95% CI | pvalues         | pvalues adjusted | Fold difference | Lower 95% CI | Higher 95% CI | pvalues         | pvalues adjusted |
| Sph         | 0.91            | 0.77         | 1.07          | 2.60E-01        | 3.55E-01         | 0.93            | 0.80         | 1.09          | 4.16E-01        | 5.33E-01         |
| S1P         | 0.83            | 0.73         | 0.95          | <b>1.61E-02</b> | 5.51E-02         | 0.88            | 0.73         | 1.07          | 2.25E-01        | 3.29E-01         |
| dhCer       | 0.78            | 0.60         | 1.03          | 1.06E-01        | 1.89E-01         | 0.74            | 0.59         | 0.94          | <b>2.79E-02</b> | 6.01E-02         |
| Cer(d)      | 0.82            | 0.62         | 1.09          | 2.01E-01        | 2.94E-01         | 0.69            | 0.56         | 0.86          | <b>5.76E-03</b> | <b>1.97E-02</b>  |
| Cer(m)      | 0.87            | 0.67         | 1.14          | 3.30E-01        | 4.10E-01         | 0.97            | 0.79         | 1.19          | 7.85E-01        | 8.94E-01         |
| MHC         | 0.99            | 0.75         | 1.30          | 9.32E-01        | 9.55E-01         | 0.71            | 0.60         | 0.86          | <b>3.37E-03</b> | <b>1.73E-02</b>  |
| DHC         | 1.39            | 1.03         | 1.87          | <b>4.88E-02</b> | 1.34E-01         | 1.14            | 0.82         | 1.57          | 4.57E-01        | 5.68E-01         |
| THC         | 0.73            | 0.53         | 1.01          | 8.35E-02        | 1.56E-01         | 0.64            | 0.44         | 0.92          | <b>3.14E-02</b> | 6.43E-02         |
| GM3         | 1.00            | 0.77         | 1.29          | 9.99E-01        | 9.99E-01         | 0.95            | 0.74         | 1.22          | 6.91E-01        | 8.10E-01         |
| GM1         | 0.78            | 0.16         | 3.73          | 7.61E-01        | 8.00E-01         | 0.55            | 0.10         | 2.90          | 4.91E-01        | 5.92E-01         |
| Sulfatide   | 1.19            | 0.84         | 1.70          | 3.47E-01        | 4.18E-01         | 1.00            | 0.80         | 1.24          | 9.79E-01        | 9.80E-01         |
| SM          | 0.89            | 0.76         | 1.04          | 1.77E-01        | 2.69E-01         | 0.75            | 0.64         | 0.88          | <b>4.66E-03</b> | <b>1.97E-02</b>  |
| PA          | 0.84            | 0.71         | 1.00          | 7.47E-02        | 1.53E-01         | 1.00            | 0.86         | 1.16          | 9.80E-01        | 9.80E-01         |
| PC          | 0.82            | 0.73         | 0.92          | <b>4.21E-03</b> | 5.33E-02         | 0.75            | 0.66         | 0.85          | <b>8.86E-04</b> | <b>8.74E-03</b>  |
| PC(O)       | 0.80            | 0.69         | 0.93          | <b>1.04E-02</b> | 5.33E-02         | 0.77            | 0.65         | 0.92          | <b>1.31E-02</b> | <b>4.12E-02</b>  |
| PC(P)       | 0.80            | 0.69         | 0.92          | <b>9.86E-03</b> | 5.33E-02         | 0.67            | 0.56         | 0.80          | <b>9.62E-04</b> | <b>8.74E-03</b>  |
| LPC         | 0.85            | 0.75         | 0.97          | <b>3.10E-02</b> | 9.78E-02         | 0.84            | 0.73         | 0.96          | <b>2.72E-02</b> | 6.01E-02         |
| LPC(O)      | 0.94            | 0.84         | 1.04          | 2.40E-01        | 3.39E-01         | 0.79            | 0.64         | 0.98          | 5.30E-02        | 9.88E-02         |
| LPC(P)      | 0.69            | 0.53         | 0.89          | <b>1.34E-02</b> | 5.49E-02         | 0.59            | 0.47         | 0.75          | <b>8.06E-04</b> | <b>8.74E-03</b>  |
| PE          | 0.77            | 0.61         | 0.98          | 5.24E-02        | 1.34E-01         | 0.68            | 0.52         | 0.89          | <b>1.54E-02</b> | <b>4.50E-02</b>  |
| PE(O)       | 0.76            | 0.59         | 0.99          | 6.26E-02        | 1.35E-01         | 0.62            | 0.50         | 0.78          | <b>1.28E-03</b> | <b>8.74E-03</b>  |
| PE(P)       | 0.74            | 0.62         | 0.89          | <b>5.58E-03</b> | 5.33E-02         | 0.67            | 0.55         | 0.83          | <b>3.25E-03</b> | <b>1.73E-02</b>  |
| LPE         | 0.70            | 0.57         | 0.88          | <b>7.97E-03</b> | 5.33E-02         | 0.69            | 0.56         | 0.86          | <b>5.57E-03</b> | <b>1.97E-02</b>  |
| LPE(P)      | 0.84            | 0.71         | 0.99          | 6.09E-02        | 1.35E-01         | 0.87            | 0.67         | 1.14          | 3.47E-01        | 4.64E-01         |
| PI          | 0.90            | 0.74         | 1.10          | 3.13E-01        | 4.00E-01         | 0.73            | 0.61         | 0.87          | <b>5.01E-03</b> | <b>1.97E-02</b>  |
| PIP1        | 1.10            | 0.73         | 1.66          | 6.49E-01        | 7.07E-01         | 0.70            | 0.34         | 1.44          | 3.51E-01        | 4.64E-01         |
| LPI         | 0.96            | 0.79         | 1.16          | 6.56E-01        | 7.07E-01         | 0.81            | 0.70         | 0.94          | <b>1.78E-02</b> | <b>4.55E-02</b>  |
| PS          | 1.37            | 0.92         | 2.05          | 1.46E-01        | 2.49E-01         | 1.01            | 0.75         | 1.36          | 9.59E-01        | 9.80E-01         |
| LPS         | 0.82            | 0.67         | 1.01          | 8.07E-02        | 1.56E-01         | 0.86            | 0.70         | 1.06          | 1.75E-01        | 2.67E-01         |
| PG          | 0.67            | 0.51         | 0.88          | <b>1.34E-02</b> | 5.49E-02         | 0.79            | 0.60         | 1.05          | 1.35E-01        | 2.30E-01         |
| LPG         | 0.74            | 0.44         | 1.27          | 3.02E-01        | 3.99E-01         | 0.78            | 0.56         | 1.09          | 1.71E-01        | 2.67E-01         |
| CE          | 0.97            | 0.89         | 1.05          | 4.72E-01        | 5.52E-01         | 0.84            | 0.74         | 0.96          | <b>2.51E-02</b> | 6.01E-02         |
| COH         | 0.84            | 0.71         | 0.98          | <b>4.96E-02</b> | 1.34E-01         | 0.74            | 0.64         | 0.85          | <b>1.16E-03</b> | <b>8.74E-03</b>  |
| DE          | 1.05            | 0.89         | 1.25          | 5.79E-01        | 6.59E-01         | 0.80            | 0.59         | 1.08          | 1.76E-01        | 2.67E-01         |

|                      |      |      |      |                 |          |      |      |      |                 |                 |
|----------------------|------|------|------|-----------------|----------|------|------|------|-----------------|-----------------|
| <b>FFA</b>           | 0.86 | 0.78 | 0.94 | <b>6.78E-03</b> | 5.33E-02 | 0.87 | 0.78 | 0.98 | <b>4.08E-02</b> | 7.97E-02        |
| <b>Acylcarnitine</b> | 1.24 | 0.93 | 1.65 | 1.60E-01        | 2.62E-01 | 1.05 | 0.67 | 1.65 | 8.25E-01        | 9.14E-01        |
| <b>DG</b>            | 0.42 | 0.23 | 0.77 | <b>1.56E-02</b> | 5.51E-02 | 0.47 | 0.27 | 0.80 | <b>1.77E-02</b> | <b>4.55E-02</b> |
| <b>TG</b>            | 0.57 | 0.41 | 0.79 | <b>5.05E-03</b> | 5.33E-02 | 0.72 | 0.52 | 1.00 | 7.05E-02        | 1.26E-01        |
| <b>TG(O)</b>         | 0.91 | 0.83 | 0.99 | 5.80E-02        | 1.35E-01 | 0.96 | 0.90 | 1.03 | 2.53E-01        | 3.58E-01        |
| <b>Ubiquinone</b>    | 0.86 | 0.71 | 1.05 | 1.70E-01        | 2.67E-01 | 0.98 | 0.83 | 1.17 | 8.63E-01        | 9.31E-01        |

Supplementary Table 2 - Brain lipid class differences between WT and 5xFAD\*Tg30 mice related to Figure 6.

| Lipid class | Female Mice     |              |               |                 |                  | Male Mice       |              |               |                 |                  |
|-------------|-----------------|--------------|---------------|-----------------|------------------|-----------------|--------------|---------------|-----------------|------------------|
|             | Fold difference | Lower 95% CI | Higher 95% CI | pvalues         | pvalues adjusted | Fold difference | Lower 95% CI | Higher 95% CI | pvalues         | pvalues adjusted |
| Sph         | 1.16            | 1.00         | 1.34          | 7.36E-02        | 3.28E-01         | 1.23            | 1.09         | 1.39          | <b>7.57E-03</b> | 1.51E-01         |
| S1P         | 0.90            | 0.67         | 1.21          | 5.01E-01        | 6.42E-01         | 0.77            | 0.49         | 1.18          | 2.56E-01        | 4.56E-01         |
| dhCer       | 1.04            | 0.94         | 1.14          | 4.93E-01        | 6.42E-01         | 0.99            | 0.86         | 1.13          | 8.73E-01        | 8.95E-01         |
| Cer(d)      | 1.30            | 0.98         | 1.74          | 9.82E-02        | 3.28E-01         | 1.20            | 0.80         | 1.81          | 4.06E-01        | 5.60E-01         |
| Cer(m)      | 0.61            | 0.35         | 1.06          | 1.04E-01        | 3.28E-01         | 0.84            | 0.35         | 2.02          | 7.10E-01        | 7.89E-01         |
| MHC         | 0.74            | 0.42         | 1.31          | 3.22E-01        | 5.07E-01         | 1.21            | 0.69         | 2.13          | 5.18E-01        | 6.47E-01         |
| DHC         | 1.24            | 0.97         | 1.59          | 1.14E-01        | 3.28E-01         | 1.16            | 0.91         | 1.48          | 2.62E-01        | 4.56E-01         |
| THC         | 1.66            | 0.95         | 2.91          | 9.88E-02        | 3.28E-01         | 1.63            | 0.89         | 2.97          | 1.42E-01        | 3.64E-01         |
| GM3         | 2.87            | 1.82         | 4.52          | <b>6.84E-04</b> | <b>2.80E-02</b>  | 1.73            | 0.92         | 3.26          | 1.20E-01        | 3.64E-01         |
| GM1         | 1.36            | 0.85         | 2.18          | 2.20E-01        | 4.29E-01         | 1.10            | 0.71         | 1.69          | 6.76E-01        | 7.73E-01         |
| Sulfatide   | 0.87            | 0.53         | 1.42          | 5.85E-01        | 6.86E-01         | 1.54            | 0.96         | 2.47          | 1.03E-01        | 3.64E-01         |
| SM          | 1.07            | 0.75         | 1.51          | 7.24E-01        | 7.77E-01         | 1.53            | 1.07         | 2.20          | <b>4.27E-02</b> | 2.44E-01         |
| PA          | 0.76            | 0.51         | 1.12          | 1.93E-01        | 4.02E-01         | 1.10            | 0.80         | 1.50          | 5.80E-01        | 6.82E-01         |
| PC          | 1.09            | 0.95         | 1.25          | 2.47E-01        | 4.40E-01         | 1.18            | 0.91         | 1.53          | 2.36E-01        | 4.50E-01         |
| PC(O)       | 1.24            | 0.96         | 1.61          | 1.23E-01        | 3.28E-01         | 1.27            | 0.94         | 1.71          | 1.49E-01        | 3.64E-01         |
| PC(P)       | 1.25            | 0.96         | 1.62          | 1.28E-01        | 3.28E-01         | 1.30            | 0.93         | 1.80          | 1.55E-01        | 3.64E-01         |
| LPC         | 1.18            | 1.01         | 1.37          | 5.92E-02        | 3.04E-01         | 1.43            | 1.12         | 1.83          | <b>1.69E-02</b> | 1.69E-01         |
| LPC(O)      | 1.30            | 1.12         | 1.51          | <b>4.55E-03</b> | 8.62E-02         | 1.45            | 1.11         | 1.89          | <b>2.22E-02</b> | 1.78E-01         |
| LPC(P)      | 1.27            | 1.10         | 1.47          | <b>6.31E-03</b> | 8.62E-02         | 1.17            | 0.77         | 1.78          | 4.72E-01        | 6.29E-01         |
| PE          | 1.22            | 0.92         | 1.61          | 1.96E-01        | 4.02E-01         | 1.33            | 0.80         | 2.20          | 2.97E-01        | 4.75E-01         |
| PE(O)       | 1.11            | 0.79         | 1.54          | 5.61E-01        | 6.77E-01         | 1.45            | 0.87         | 2.42          | 1.82E-01        | 3.83E-01         |
| PE(P)       | 1.06            | 0.77         | 1.47          | 7.21E-01        | 7.77E-01         | 1.43            | 0.82         | 2.50          | 2.34E-01        | 4.50E-01         |
| LPE         | 1.21            | 1.04         | 1.40          | <b>2.66E-02</b> | 1.56E-01         | 1.64            | 1.17         | 2.29          | <b>1.58E-02</b> | 1.69E-01         |
| LPE(P)      | 1.29            | 1.10         | 1.52          | <b>8.63E-03</b> | 8.85E-02         | 1.41            | 0.90         | 2.22          | 1.64E-01        | 3.65E-01         |
| PI          | 1.25            | 0.88         | 1.76          | 2.36E-01        | 4.40E-01         | 1.55            | 1.09         | 2.20          | <b>3.44E-02</b> | 2.30E-01         |
| PIP1        | 1.11            | 0.63         | 1.96          | 7.30E-01        | 7.77E-01         | 1.22            | 0.63         | 2.35          | 5.68E-01        | 6.82E-01         |
| LPI         | 0.75            | 0.63         | 0.91          | <b>1.09E-02</b> | 8.94E-02         | 1.26            | 0.67         | 2.35          | 4.90E-01        | 6.32E-01         |
| PS          | 1.10            | 0.96         | 1.26          | 1.94E-01        | 4.02E-01         | 1.03            | 0.77         | 1.37          | 8.71E-01        | 8.95E-01         |
| LPS         | 1.27            | 1.06         | 1.52          | <b>2.20E-02</b> | 1.50E-01         | 1.50            | 1.02         | 2.20          | 6.61E-02        | 2.94E-01         |
| PG          | 1.14            | 0.86         | 1.51          | 3.84E-01        | 5.43E-01         | 1.27            | 0.84         | 1.91          | 2.86E-01        | 4.75E-01         |
| LPG         | 0.89            | 0.44         | 1.79          | 7.47E-01        | 7.77E-01         | 2.79            | 1.08         | 7.23          | 6.07E-02        | 2.94E-01         |
| CE          | 0.95            | 0.71         | 1.28          | 7.58E-01        | 7.77E-01         | 0.96            | 0.66         | 1.39          | 8.27E-01        | 8.94E-01         |
| COH         | 1.07            | 0.93         | 1.23          | 3.46E-01        | 5.25E-01         | 1.23            | 0.95         | 1.58          | 1.40E-01        | 3.64E-01         |
| DE          | 0.82            | 0.57         | 1.18          | 3.07E-01        | 5.07E-01         | 0.84            | 0.58         | 1.21          | 3.69E-01        | 5.27E-01         |

|                      |      |      |      |          |          |      |      |      |                 |                 |
|----------------------|------|------|------|----------|----------|------|------|------|-----------------|-----------------|
| <b>FFA</b>           | 0.90 | 0.69 | 1.18 | 4.60E-01 | 6.28E-01 | 0.75 | 0.54 | 1.04 | 1.14E-01        | 3.64E-01        |
| <b>Acylcarnitine</b> | 0.94 | 0.77 | 1.14 | 5.47E-01 | 6.77E-01 | 1.31 | 0.96 | 1.79 | 1.18E-01        | 3.64E-01        |
| <b>DG</b>            | 1.00 | 0.61 | 1.62 | 9.86E-01 | 9.86E-01 | 1.82 | 1.41 | 2.34 | <b>9.70E-04</b> | <b>3.88E-02</b> |
| <b>TG</b>            | 0.87 | 0.64 | 1.18 | 3.81E-01 | 5.43E-01 | 0.83 | 0.59 | 1.18 | 3.29E-01        | 5.06E-01        |
| <b>TG(O)</b>         | 0.85 | 0.63 | 1.15 | 3.12E-01 | 5.07E-01 | 0.82 | 0.56 | 1.21 | 3.42E-01        | 5.07E-01        |
| <b>Ubiquinone</b>    | 1.40 | 0.95 | 2.06 | 1.20E-01 | 3.28E-01 | 0.96 | 0.49 | 1.88 | 8.99E-01        | 8.99E-01        |
